# Supplementary material for: Prediction of mortality in metastatic colorectal cancer in a real-life population: a multicenter explorative analysis
Source: Springer Nature journal article supplement (doi:10.1186/s12885-020-07656-w), 2020-11-25

**A**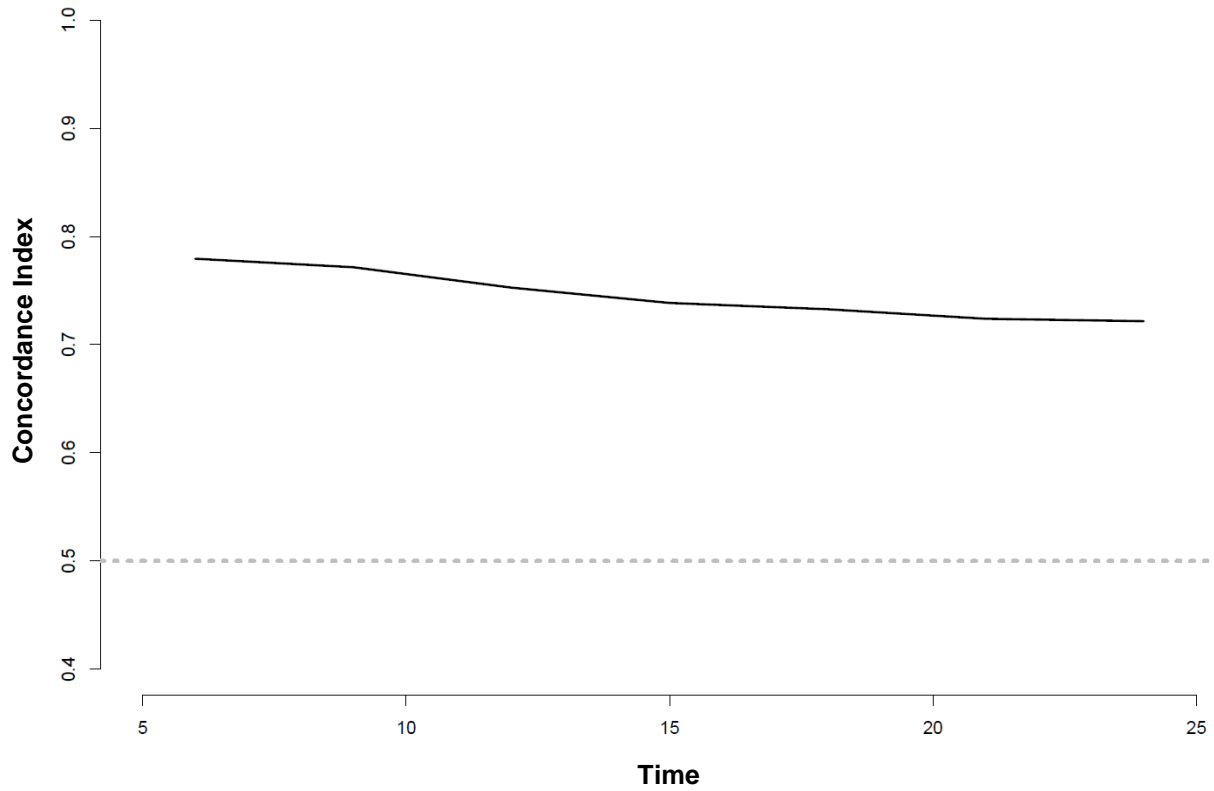**B**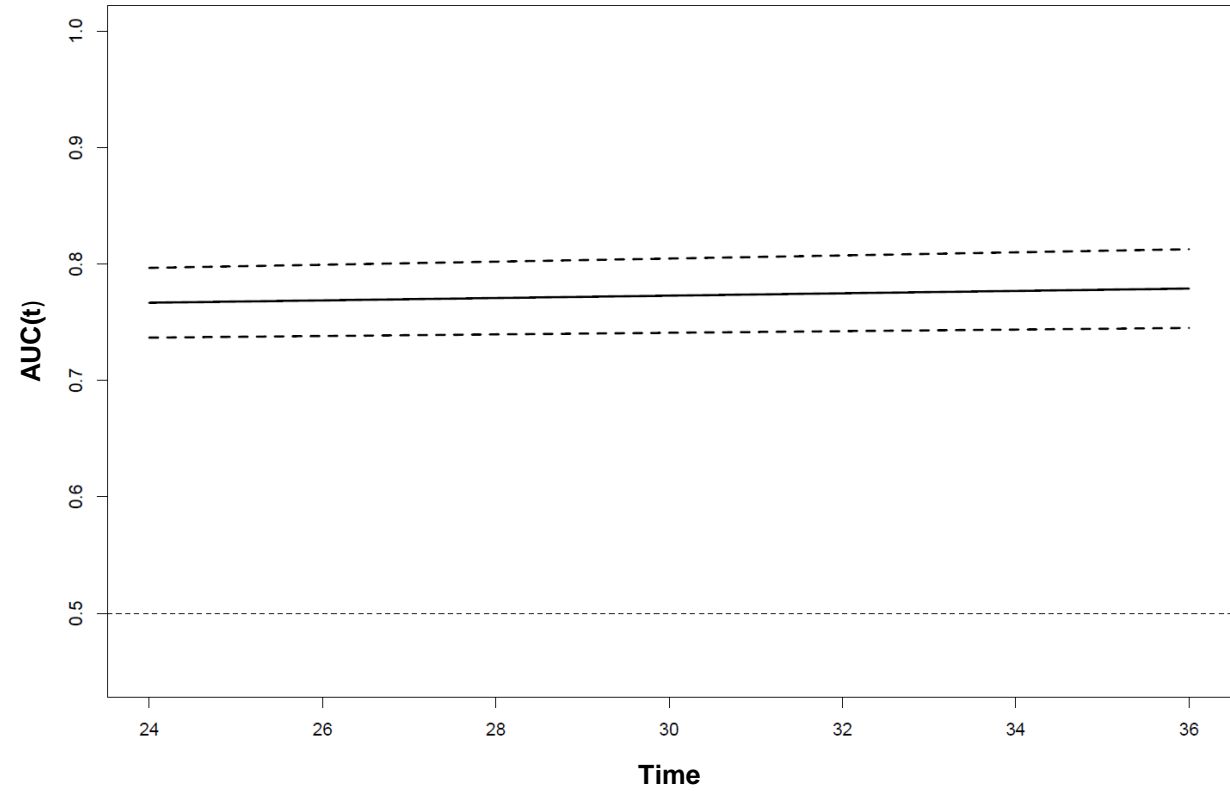

Supplement: MOESM1 [file 18625658]
